# Supplementary material for: Associations between Suboptimal Sleep and Smoking, Poor Nutrition, Harmful Alcohol Consumption and Inadequate Physical Activity (‘SNAP Risks’): A Comparison of People with and without a Mental Health Condition in an Australian Community Survey
Source: MDPI journal article supplement (doi:10.3390/ijerph18115946), 2021-06-01
Supplement: s1 [file s1]

**Supplementary Table 1.** NSF Criteria for Categorising Sleep Parameters as 'Appropriate', 'May be appropriate' and 'Suboptimal', According to Age.

| Sleep parameter                  | Age   | Appropriate | May be appropriate | Suboptimal |
|----------------------------------|-------|-------------|--------------------|------------|
| Sleep duration (hours)           | 18-25 | 7-9         | 6, 10-11           | < 6, >11   |
|                                  | 26-64 | 7-9         | 6, 10              | < 6, >10   |
|                                  | 65+   | 7-8         | 5-6, 9             | <5, >9     |
| Sleep onset latency (minutes)    | 18-25 | ≤30         | >30 ≤45            | >45        |
|                                  | 26-64 | ≤30         | >30 ≤45            | >45        |
|                                  | 65+   | ≤30         | >30 ≤60            | > 60       |
| Awakenings (>5min)               | 18-25 | ≤1          | >1 ≤3              | >3         |
|                                  | 26-64 | ≤1          | >1 ≤3              | >3         |
|                                  | 65+   | ≤2          | >2 ≤3              | >3         |
| Wake after sleep onset (minutes) | 18-25 | ≤20         | >20 ≤40            | >40        |
|                                  | 26-64 | ≤20         | >20 ≤40            | >40        |
|                                  | 65+   | ≤30         | >30                | N/A        |
| Sleep efficiency (%)             | 18-25 | ≥85         | <85 ≥65            | <65        |
|                                  | 26-64 | ≥85         | <85 ≥75            | <75        |
|                                  | 65+   | ≥85         | <85 ≥75            | <75        |
| Naps per day (n)                 | 18-25 | 0           | 1-2                | >2         |
|                                  | 26-64 | N/A         | 0-3                | >3         |
|                                  | 65+   | N/A         | 0-3                | >3         |
| Nap duration (minutes)           | 18-25 | N/A         | 0-100              | >100       |
|                                  | 26-64 | N/A         | 0-100              | >100       |
|                                  | 65+   | N/A         | 0-100              | >100       |
| Nap frequency (days)             | 18-25 | 0           | ≥1                 | N/A        |
|                                  | 26-64 | N/A         | N/A                | N/A        |
|                                  | 65+   | N/A         | N/A                | N/A        |

N/A: not applicable, no 'suboptimal' criteria.

**Supplementary Table 2.** Variations in Associations between Suboptimal Sleep and SNAP risks According to Mental Health Status

| Mental Health Status                   | SNAP risk         | OR   | 95 % CI |       |   |
|----------------------------------------|-------------------|------|---------|-------|---|
|                                        |                   |      | Lower   | Upper |   |
| Sleep Duration (Weekdays) <sup>1</sup> |                   |      |         |       |   |
| MHC <sup>2</sup>                       | Smoking risk      | 2.10 | 0.80    | 5.48  | * |
|                                        | No smoking risk   | 2.33 | 1.22    | 4.44  |   |
| MHC <sup>2</sup>                       | Nutrition risk    | 2.33 | 1.22    | 4.44  |   |
|                                        | No nutrition risk | 1.89 | 0.54    | 6.62  |   |
| MHC <sup>2</sup>                       | Alcohol risk      | 3.06 | 1.41    | 6.64  |   |
|                                        | No alcohol risk   | 1.60 | 0.73    | 3.49  |   |
| MHC <sup>2</sup>                       | PA risk           | 1.89 | 0.54    | 6.62  |   |
|                                        | No PA risk        | 1.89 | 0.54    | 6.62  |   |
| Sleep Duration (Weekends) <sup>1</sup> |                   |      |         |       |   |
| MHC <sup>2</sup>                       | Smoking risk      | 1.87 | 0.71    | 4.90  | * |
|                                        | No smoking risk   | 2.62 | 1.37    | 5.03  |   |
| MHC <sup>2</sup>                       | Nutrition risk    | 2.49 | 1.61    | 3.84  |   |
|                                        | No nutrition risk | 1.97 | 0.56    | 6.97  |   |
| MHC <sup>2</sup>                       | Alcohol risk      | 3.06 | 1.41    | 6.69  |   |
|                                        | No alcohol risk   | 1.60 | 0.73    | 3.52  |   |
| MHC <sup>2</sup>                       | PA risk           | 2.20 | 1.01    | 4.80  |   |
|                                        | No PA risk        | 2.23 | 1.02    | 4.88  |   |
| Sleep Onset Latency <sup>1</sup>       |                   |      |         |       |   |
| MHC <sup>2</sup>                       | Smoking risk      | 3.37 | 1.01    | 11.24 |   |
|                                        | No smoking risk   | 1.85 | 0.75    | 4.56  |   |
| MHC <sup>2</sup>                       | Nutrition risk    | 2.79 | 1.72    | 4.54  |   |
|                                        | No nutrition risk | 2.24 | 0.39    | 12.95 |   |
| MHC <sup>2</sup>                       | Alcohol risk      | 1.87 | 0.65    | 5.34  |   |
|                                        | No alcohol risk   | 3.34 | 1.21    | 9.20  |   |
| MHC <sup>2</sup>                       | PA risk           | 2.27 | 0.80    | 6.46  |   |
|                                        | No PA risk        | 2.75 | 1.01    | 7.45  |   |
| Awakenings <sup>1</sup>                |                   |      |         |       |   |
| MHC <sup>2</sup>                       | Smoking risk      | 4.12 | 1.31    | 12.93 |   |
|                                        | No smoking risk   | 3.17 | 1.48    | 6.80  |   |
| MHC <sup>2</sup>                       | Nutrition risk    | 2.44 | 1.41    | 4.21  |   |
|                                        | No nutrition risk | 5.37 | 1.27    | 22.66 |   |
| MHC <sup>2</sup>                       | Alcohol risk      | 3.13 | 1.23    | 7.97  |   |
|                                        | No alcohol risk   | 4.17 | 1.66    | 10.49 |   |
| MHC <sup>2</sup>                       | PA risk           | 3.42 | 1.36    | 8.66  |   |
|                                        | No PA risk        | 3.82 | 1.52    | 9.54  |   |

| Wake After Sleep Onset <sup>1</sup> |                   |      |      |       |   |
|-------------------------------------|-------------------|------|------|-------|---|
| MHC <sup>2</sup>                    | Smoking risk      | 5.07 | 1.12 | 22.95 |   |
|                                     | No smoking risk   | 2.58 | 0.93 | 7.18  |   |
| MHC <sup>2</sup>                    | Nutrition risk    | 2.04 | 1.04 | 4.02  |   |
|                                     | No nutrition risk | 6.41 | 0.88 | 46.55 |   |
| MHC <sup>2</sup>                    | Alcohol risk      | 2.58 | 0.75 | 8.82  |   |
|                                     | No alcohol risk   | 5.08 | 1.49 | 17.25 |   |
| MHC <sup>2</sup>                    | PA risk           | 3.14 | 0.93 | 10.61 |   |
|                                     | No PA risk        | 4.16 | 1.23 | 14.05 |   |
| Sleep Efficiency <sup>1</sup>       |                   |      |      |       |   |
| MHC <sup>2</sup>                    | Smoking risk      | 3.26 | 0.60 | 17.66 |   |
|                                     | No smoking risk   | 1.86 | 0.55 | 6.22  |   |
| MHC <sup>2</sup>                    | Nutrition risk    | 2.83 | 1.38 | 5.79  |   |
|                                     | No nutrition risk | 2.14 | 0.20 | 22.84 |   |
| MHC <sup>2</sup>                    | Alcohol risk      | 1.98 | 0.49 | 8.04  |   |
|                                     | No alcohol risk   | 3.06 | 0.74 | 12.63 |   |
| MHC <sup>2</sup>                    | PA risk           | 3.38 | 0.86 | 13.28 |   |
|                                     | No PA risk        | 1.79 | 0.42 | 7.59  |   |
| Nap Duration <sup>1</sup>           |                   |      |      |       |   |
| MHC <sup>2</sup>                    | Smoking risk      | 2.64 | 0.51 | 13.65 |   |
|                                     | No smoking risk   | 2.69 | 0.70 | 10.36 |   |
| MHC <sup>2</sup>                    | Nutrition risk    | 2.25 | 1.01 | 5.02  |   |
|                                     | No nutrition risk | 3.16 | 0.27 | 37.14 |   |
| MHC <sup>2</sup>                    | Alcohol risk      | 4.70 | 1.06 | 20.93 |   |
|                                     | No alcohol risk   | 1.51 | 0.34 | 6.68  |   |
| MHC <sup>2</sup>                    | PA risk           | 7.96 | 1.90 | 33.22 | * |
|                                     | No PA risk        | 0.89 | 0.17 | 4.57  |   |

MHC: People with a mental health condition; PA: Physical activity

<sup>1</sup> Reference category: Appropriate/may be appropriate; <sup>2</sup> Reference category: No mental health condition

\*Parameter estimate for interaction term significant at 0.05
